# Supplementary material for: Pflegevisite auf der Intensivstation: Patienten in den Mittelpunkt der Pflege rücken
Source: Springer Nature journal article supplement (doi:10.1007/s16024-022-00367-1), 2022-01-31
Supplement: MOESM1 [file 20087046]

## Fragebogen zur Pflegevisite auf der CHI 3

1. **Weißt du, dass auf der CHI 3 die Pflegevisite durchgeführt wird?**

- Ja                       Nein

**Falls Ja: Woher hast du die Information erhalten? (Mehrfachnennung möglich)**

- Stationsbesprechung  
 Nachschulung auf CHI 3  
 Information via E- Mail  
 Aushang  
 Pflegende der CHI 3  
 Praktische Durchführung der PV auf der CHI 3  
 Sonstiges: \_\_\_\_\_

2. **Hast du schon einmal an einer Pflegevisite auf der CHI 3 teilgenommen?**

- Ja                       Nein (bitte dennoch alle weiteren Fragen bis Nr. 9 beantworten)

3. **Wie häufig würdest du die Pflegevisite auf der CHI 3 durchführen?**

- Täglich  
 Einmal wöchentlich  
 Alle ..... Tage (bitte Zahl eintragen)

4. **Welche Patienten würdest du für eine Pflegevisite auswählen?**

- Alle Patienten  
 Langlieger (Patienten >3 Tage Aufenthalt)  
 Ausschließlich Patienten mit folgenden Krankheitsbildern/ in folgenden Situationen  
(bitte nennen):

5. **Wieviel Zeit in Minuten würdest du für eine Pflegevisite auf der CHI 3 pro Patient einplanen?**

..... Minuten (bitte Minutenzahl eintragen)

6. **Wie viele Personen würdest du zusätzlich zur betreuenden Pflegekraft für die Pflegevisite einsetzen?**

Anzahl der Personen (bitte Zahl nennen): \_\_\_\_\_

7. **„Die Pflegevisite trägt dazu bei, dass der Patient auf der CHI 3 bewusster in den Fokus der Pflege gerückt wird.“ Dieser Aussage stimme ich (bitte ankreuzen):**

- voll zu                                                  überhaupt nicht zu  
                                         1      2      3      4      5      6

## Fragebogen zur Pflegevisite auf der CHI 3

8. **„Mir hat die Pflegevisite geholfen, pflegerische Maßnahmen bewusster an die Bedürfnisse des Patienten anzupassen.“** Dieser Aussage stimme ich (bitte ankreuzen):

voll zu  1  2  3  4  5  6 überhaupt nicht zu

9. **„Die Pflegevisite bewirkt eine positive Veränderung der Pflegequalität auf der CHI 3.“** Dieser Aussage stimme ich (bitte ankreuzen):

voll zu  1  2  3  4  5  6 überhaupt nicht zu

**Woran würdest du die verbesserte Pflegequalität festmachen (Mehrfachnennung möglich)?**

- Standards wurden eingehalten, z.B. bei Verbänden
- Es wird patientenorientierter gepflegt
- Verbesserung der Dokumentation
- Sicherer Umgang mit den PatientInnen
- Sonstiges: \_\_\_\_\_

**→Bitte nur dann weiter antworten, wenn du Frage 2 mit „Ja“ beantwortet hast←**

10. **Gab es von den Visiteur(inn)en ein spezifisches stationsinternes Schulungsangebot oder spezielle Hinweise zum IBF- Programm nach der Pflegevisite?**

Ja  Nein

11. **Hast du von deinen Vorgesetzten nach der Pflegevisite ein spezifisches Feedback erhalten?**

Ja  Nein

**Falls ja: Hat dir das Feedback für Ihr weiteres pflegerisches Handeln geholfen?**

Ja  Nein

12. **Hat dir die Patientenvorstellung in der Pflegevisite geholfen, deine Übergaben zu optimieren?**

Ja  Nein

13. **„Mit der Durchführung der Pflegevisite auf der CHI 3 bin ich insgesamt...“** (bitte auswählen):

voll zufrieden  1  2  3  4  5  6 überhaupt nicht zufrieden

**Folgendes könnte verbessert werden (bitte Stichpunkte nennen):**
